# Supplementary material for: Nod1-dependent NF-kB activation initiates hematopoietic stem cell specification in response to small Rho GTPases
Source: Springer Nature journal article supplement (doi:10.1038/s41467-023-43349-1), 2023-11-23
Supplement: MOESM1 [file 41467_2023_43349_MOESM1_ESM.pdf]

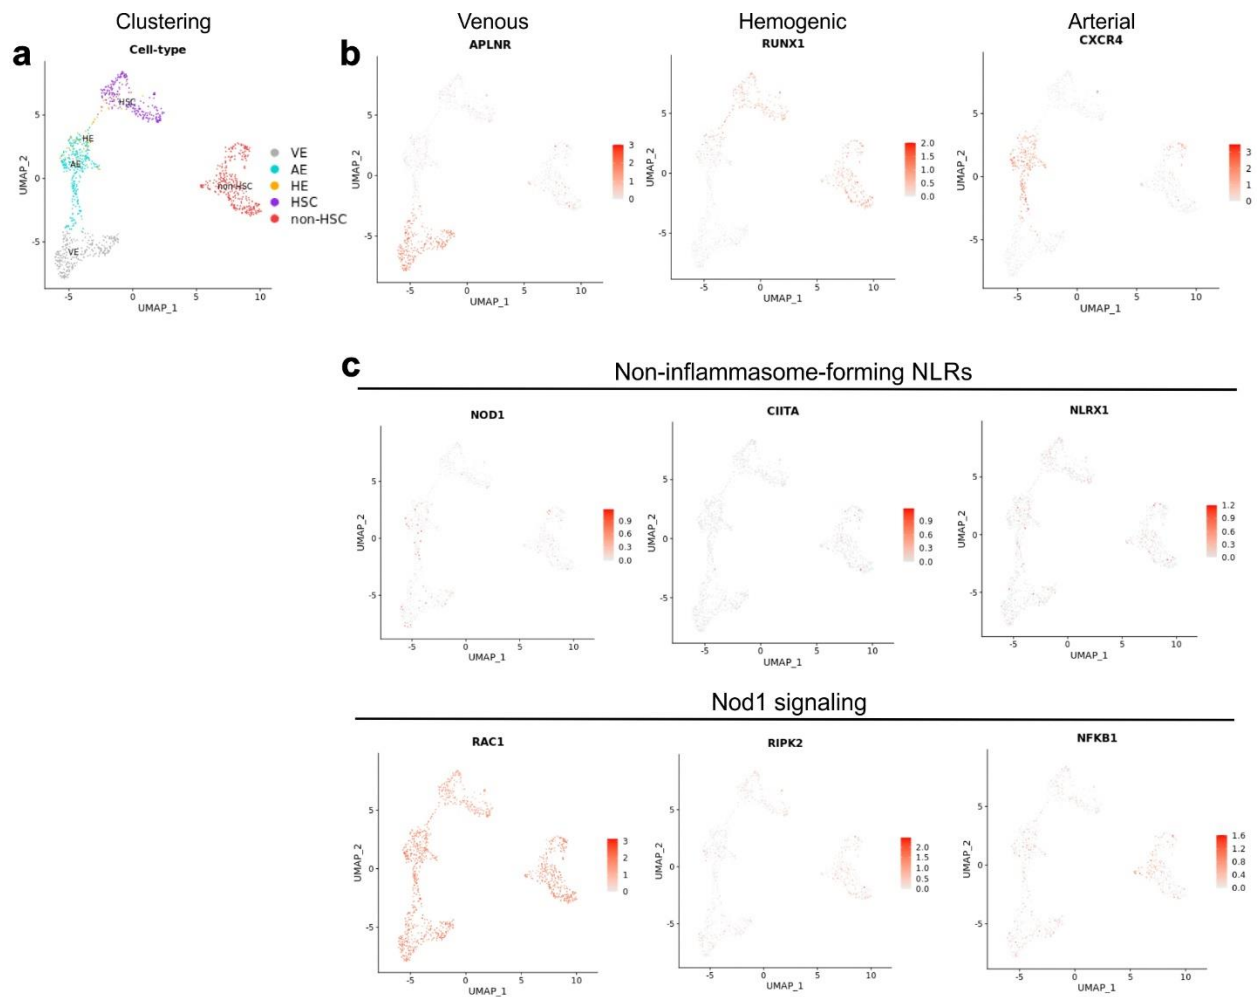

**Supplementary Figure 1.**

**(a-c)** UMAP visualization of the expression of indicated genes from human hemato-vascular populations from CS14–15 AGM tissues. Venous, hemogenic, and arterial markers are shown. Each dot represents one cell. In **b** and **c**, grey denotes minimal expression, orange intermediate, and red high. VE, venous endothelium; AE, arterial endothelium; HE, hemogenic endothelium; HSC, hematopoietic stem cells. Data extracted from <https://singlecell.mcdm.ucla.edu/Human-HSC-Ontogeny/>

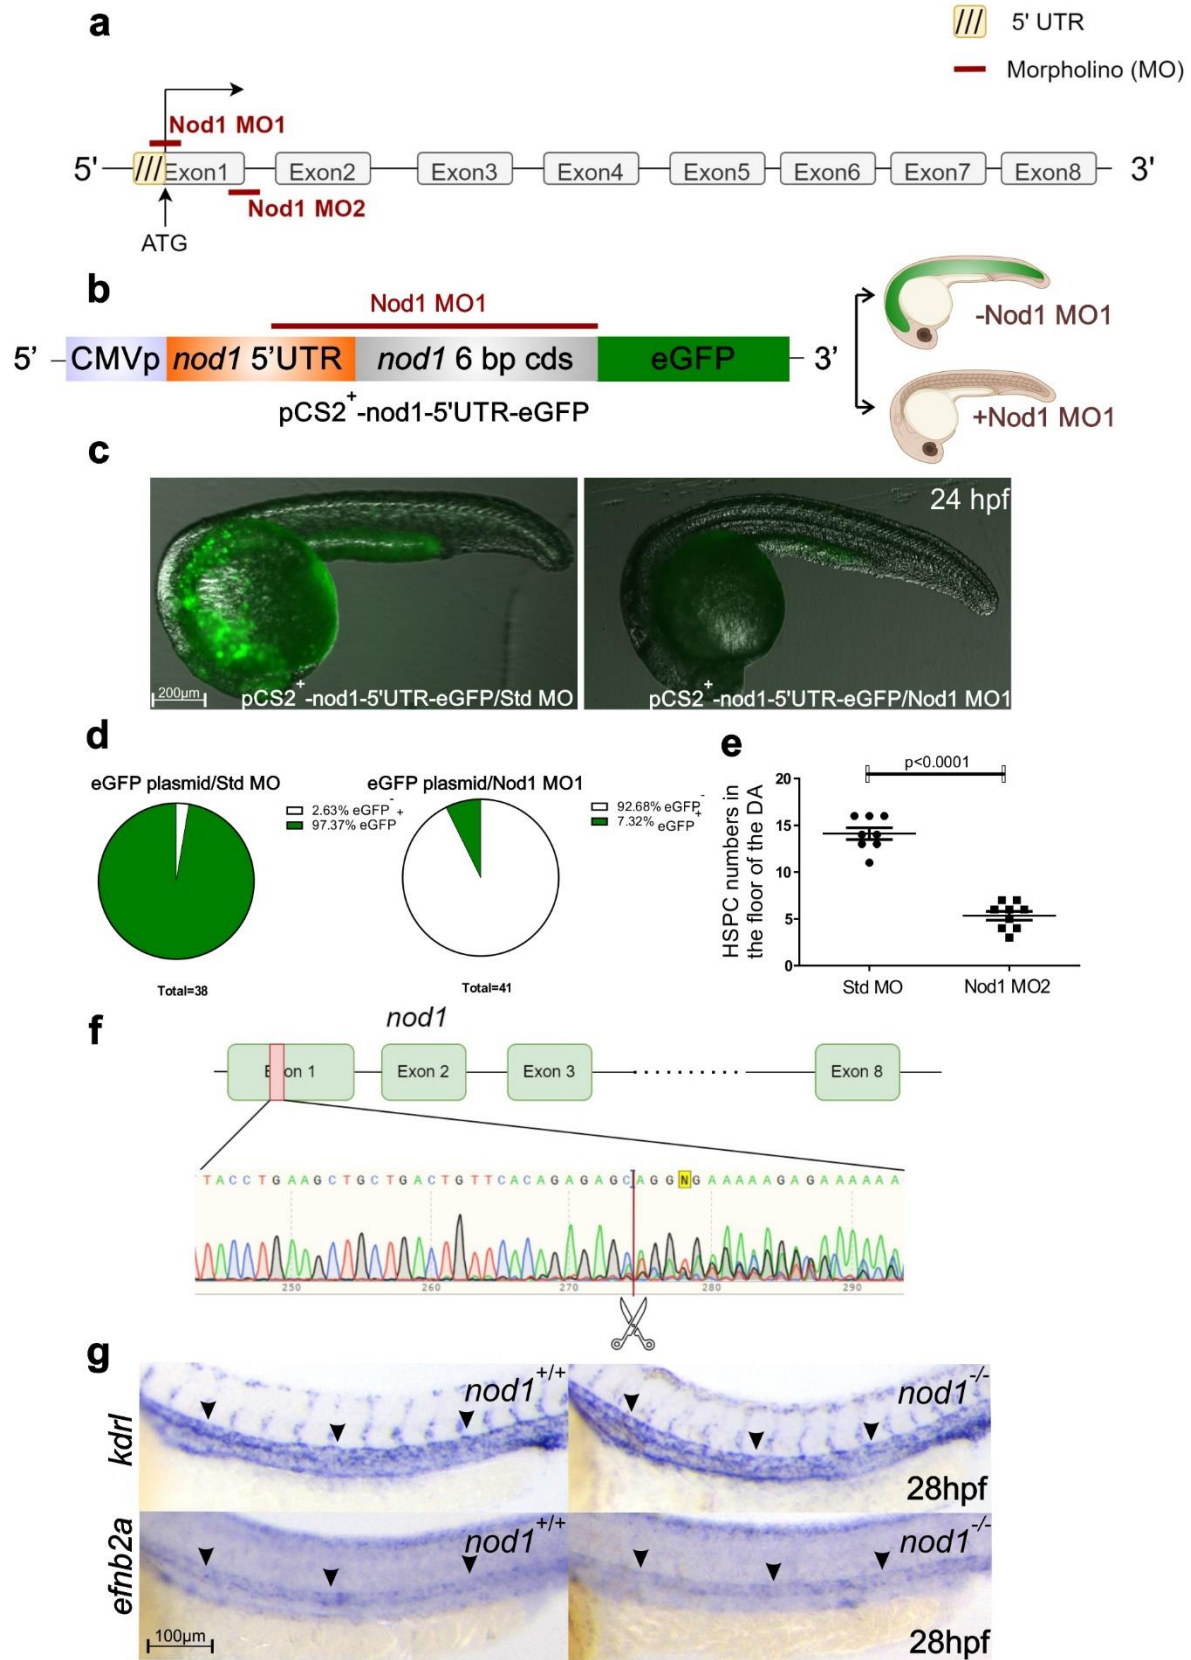

## Supplementary Figure 2.

**(a)** Schematic of binding of Nod1 MO1 (translation blocking morpholino) and Nod1 MO2 (splice blocking morpholino) to *nod1* immature mRNA. **(b)** Schematic representation of the validation strategy for Nod1 MO1. 324 bp upstream the *nod1* start codon were cloned into pCS2<sup>+</sup> under the CMV promoter (CMVp) following the first 6 nucleotides of the *nod1* coding sequence and driving eGFP expression (herein named pCS2<sup>+</sup>-*nod1*-5'UTR-eGFP). One-cell stage embryos were injected with this construct in the absence or presence of Nod1MO1. eGFP expression failed in the presence of Nod1MO. Illustrations created with BioRender.com. **(c)** Representative fluorescence images of 24 hpf embryos injected with pCS2<sup>+</sup>-*nod1*-5'UTR-eGFP and co-injected with control Std MO or Nod1 MO1. n=40 per condition. **(d)** Percentage of eGFP<sup>+</sup> embryos quantified from (c). **(e)** Quantification of *cd41*<sup>+</sup>, *kdr*<sup>+</sup> HSPCs from 48hpf *cd41:eGFP*; *kdr*:*mCherry* double-transgenic embryos injected with Std MO or Nod1 MO2 and imaged by live confocal microscopy. n=8, Std MO; n=9, Nod1 MO2. **(f)** Validation of *nod1* gRNA. A *nod1* gRNA was designed to target exon 1 of the *nod1* gene. PCR amplicons from *nod1* exon1 targeted embryos were Sanger sequenced and the results revealed sequences containing indel mutation at predicted site. **(g)** *nod1*<sup>+/+</sup> and *nod1*<sup>-/-</sup> embryos examined by WISH for *kdr* and *efnb2a* expression in the trunk at 28hpf. Arrowheads denote *kdr*<sup>+</sup> or *efnb2a*<sup>+</sup> expression. n=15 per condition. All views are lateral, with anterior to the left. Images are representative of two independent experiments. All quantifications are represented with mean ± SEM. Data was analyzed by unpaired two-tailed T-test (e). Source data are provided as a Source Data file.



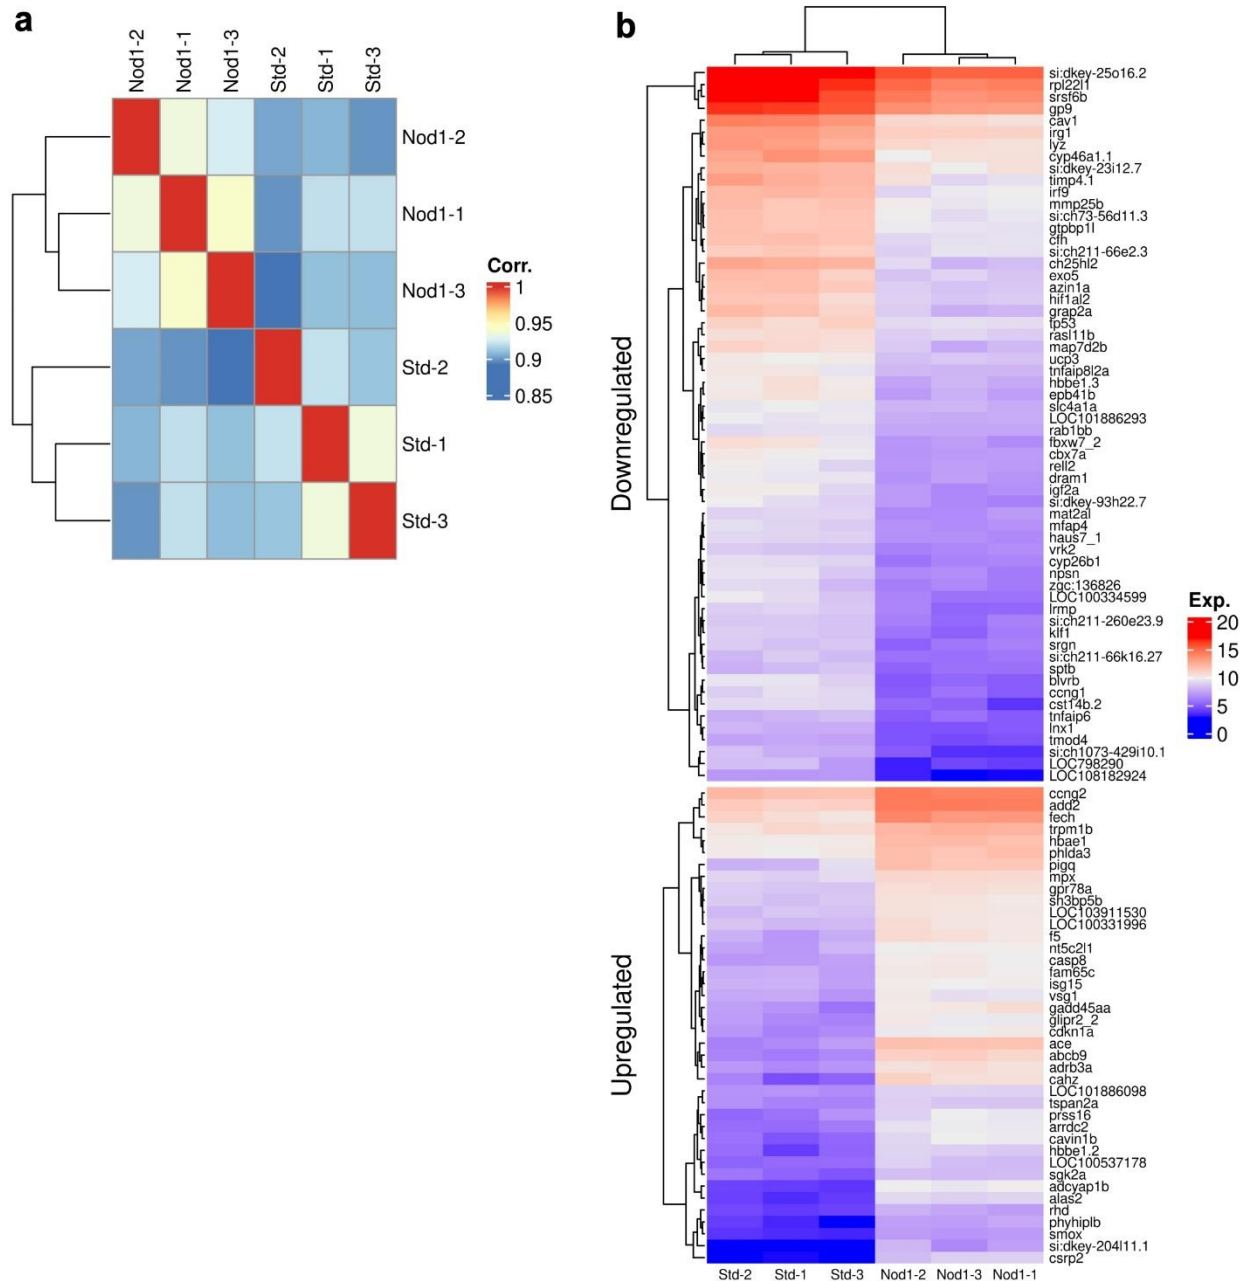

**Supplementary Figure 4.**

**(a)** *Tg(kdrl:mCherry)* embryos were injected with Std MO or Nod1 MO2 and *kdrl*<sup>+</sup> ECs were FACS purified at 22hpf for subsequent RNA-seq analysis. Sample correlation matrix displaying the overall similarity in expression profile for Std-control ECs and Nod1 deficient ECs. Red indicates stronger sample correlation. n=3 control; n=3 Nod1 MO2. **(b)** Heatmap of log<sub>2</sub> normalized counts in each sample of top 100 most significant genes with absolute log<sub>2</sub> fold change >1 (ordered by p-value). Samples with relatively high expression of a given gene are marked in red and samples with relatively low expression are marked in blue. Lighter shades and white represent genes with intermediate expression levels. Samples and genes, after separating down- and up-regulated genes, have been ordered by hierarchical clustering with Euclidean distances and complete linkage.

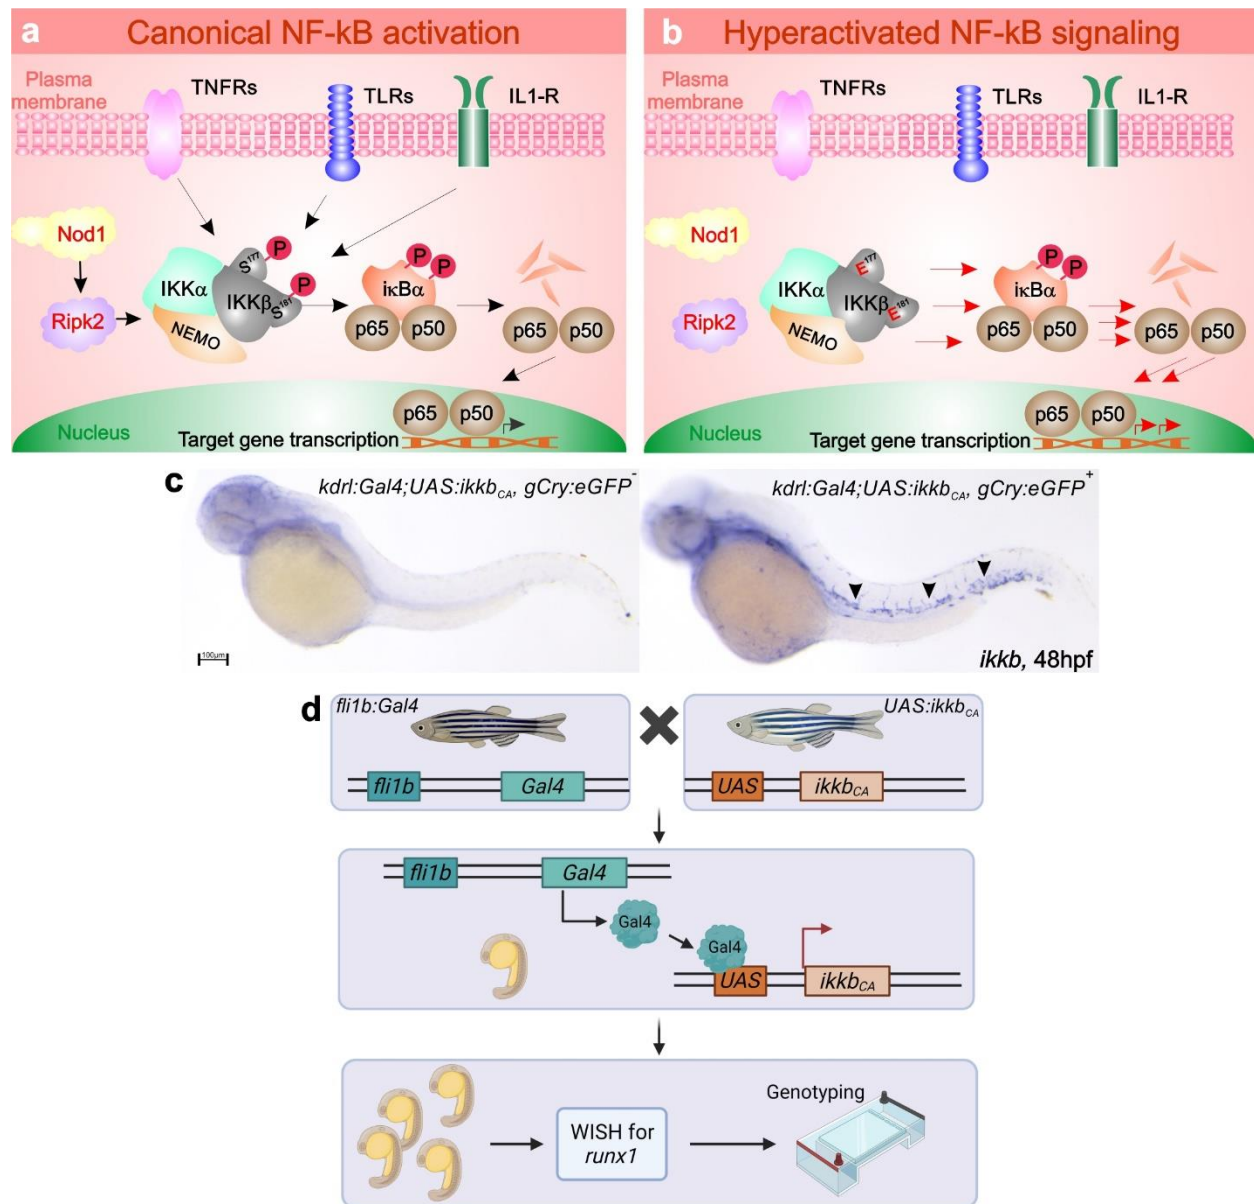

**Supplementary Figure 5.**

**(a-b)** Graphical illustration of canonical versus hyperactivated NF-κB signaling. Briefly, in the canonical NF-κB pathway (a), canonical NF-κB receptors TNFRs, IL-1R, TLRs, as well as Nod1 converge into IKKβ phosphorylation and subsequent activation. IKKβ phosphorylates IκBα, resulting in its detachment from the p65/p50 complex and degradation. Free p65/p50 heterodimers translocate to the nucleus and regulate gene transcription. In the hyperactivated NF-κB signaling pathway (b), overexpression of mutated IKKβ (IKKβ<sup>S177E/S181E</sup>) renders this kinase constitutively active, resulting in the hyperactivation of NF-κB signaling in the absence of upstream canonical NF-κB activating signals. TLRs, toll-like receptors; TNFRs, tumor necrosis factor receptors; IL1-R, interleukin 1 receptor; IKKβ, inhibitor of nuclear factor kappa-B kinase subunit beta; IKKα, inhibitor of nuclear factor kappa-B kinase subunit alpha; Nod1, Nucleotide Binding Oligomerization Domain Containing 1; Ripk2, Receptor-interacting protein kinase 2. **(c)** *Tg(kdr1:Gal4;UAS:ikkb<sub>CA</sub>)* embryos were examined by WISH for *ikkb* expression at 48hpf. Arrowheads denote *ikkb*<sup>+</sup> expression in the vasculature. n=5 per condition. All views are lateral, with anterior to the left. Images are representative of two independent experiments. **(d)** Schematic representation of the experimental design of Fig. 6h-i. Briefly, *Tg(fli1b:Gal4)* was crossed with *Tg(UAS:ikkb<sub>CA</sub>)*. Offspring embryos were

interrogated by WISH for *runx1* at 26hpf and quantified blinded. *ikkb<sub>CA</sub>* was subsequently identified by genotyping, and embryos were grouped based on the absence or presence of the *ikkb<sub>CA</sub>* cassette. Illustration created with BioRender.com.

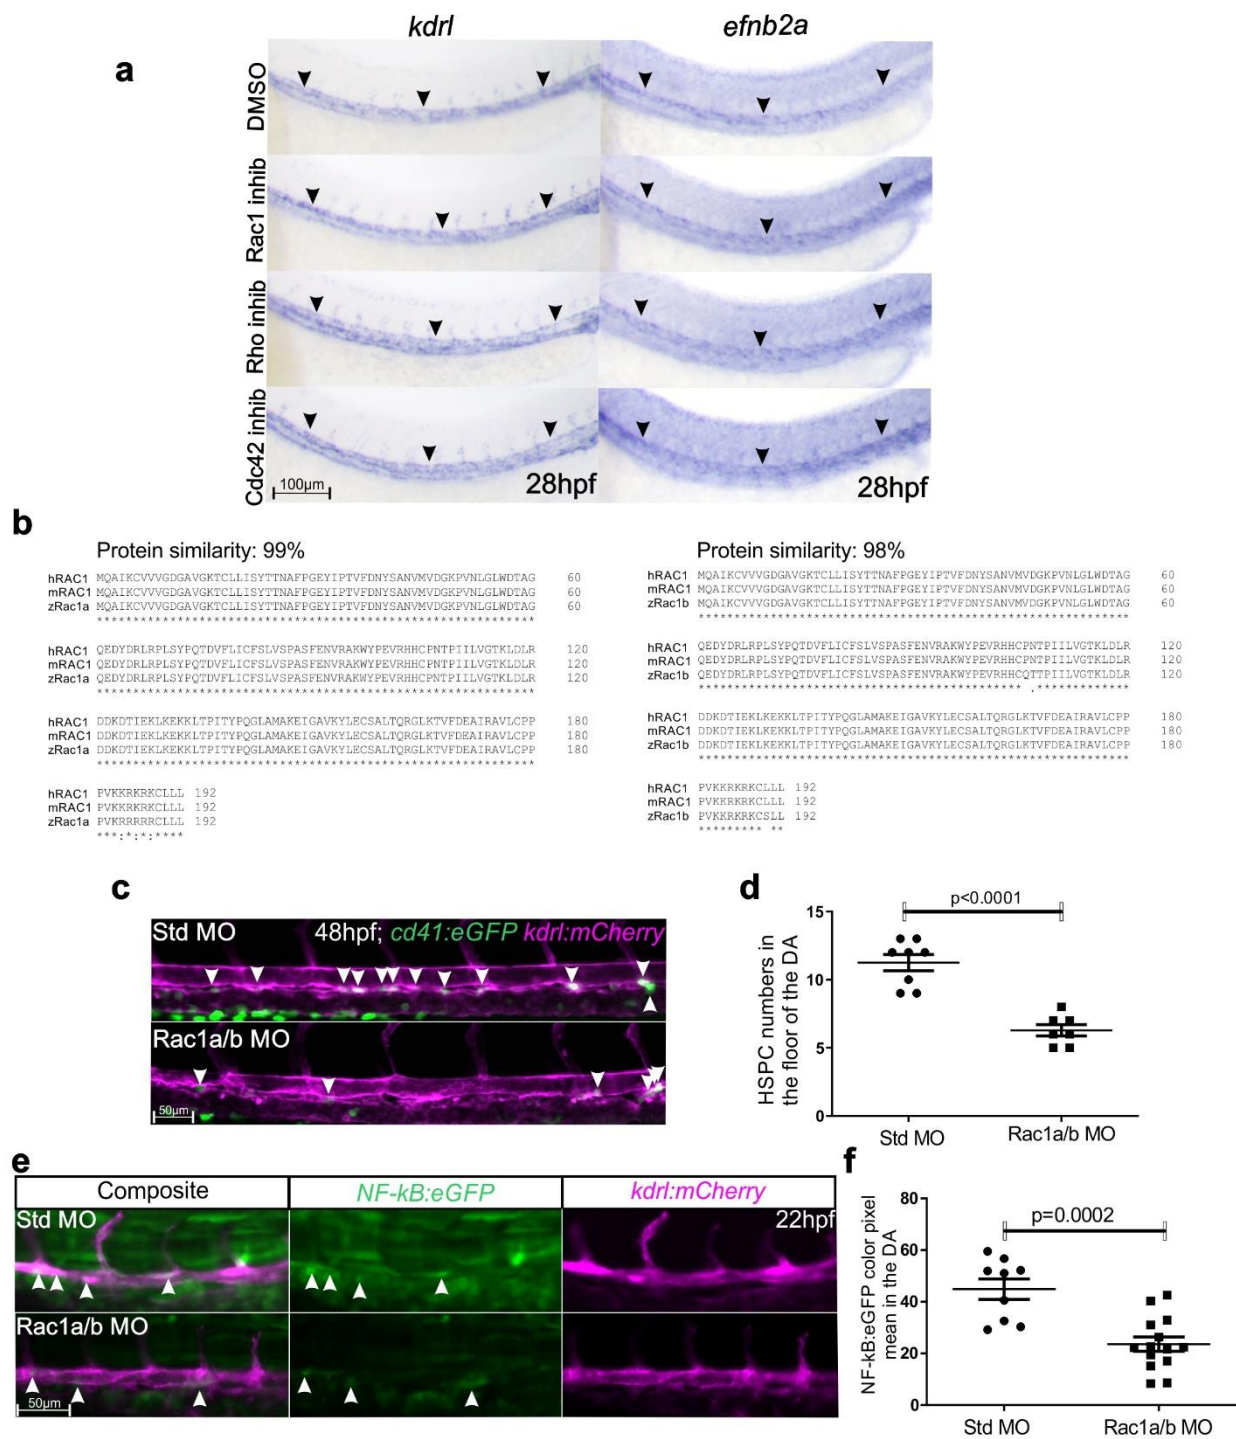

**Supplementary Figure 6.**

(a) DMSO and Small Rho GTPases inhibitor-treated embryos examined by WISH for *kdr1* and *efnb2a* expression in the trunk at 28hpf. Arrowheads denote *kdr1*<sup>+</sup> or *efnb2a*<sup>+</sup> expression in the dorsal aorta. n=15 per condition. Images are representative of two independent experiments. (b) Alignment of human (hRAC1, NP\_008839.2) and mouse (mRac1, NP\_033033.1) RAC1 with zebrafish Rac1a (zRac1a, NP\_956065.1) and zebrafish Rac1b (zRac1b, NP\_001034907.1) was performed using EM BL-EBI T-Coffee (<https://www.ebi.ac.uk/Tools/msa/tcoffee/>). (c) *cd41:eGFP*; *kdr1:mCherry* double-transgenic embryos

injected with Std MO or Rac1a/1b MOs and analyzed by live confocal microscopy at 48hpf. **(d)** Quantification of *cd41*<sup>+</sup>, *kdr*<sup>+</sup> HSPCs from (c). Each dot represents total HSPCs per embryo. n=8 Std MO, n=7 Rac1a/b MO. **(e)** Maximum projections of trunk regions of Std MO, or Rac1a/b MO-injected *kdr*<sup>+</sup>*mCherry*; *NF-kB*:eGFP double-transgenic embryos visualized by confocal microscopy at 22 hpf. Arrowheads denote ECs with active NF-kB. All views are lateral, with anterior to the left. **(f)** Quantification of *NF-kB*:eGFP activity from (e). Each dot represents eGFP<sup>+</sup> mean pixel intensity within the *kdr*<sup>+</sup> EC area delimited by two intersegmental vessels. n=9, Std MO; n=14, Rac1a/b MO. All quantifications are represented with mean  $\pm$  SEM. Data was analyzed by unpaired two-tailed T-test (d, f). Source data are provided as a Source Data file.

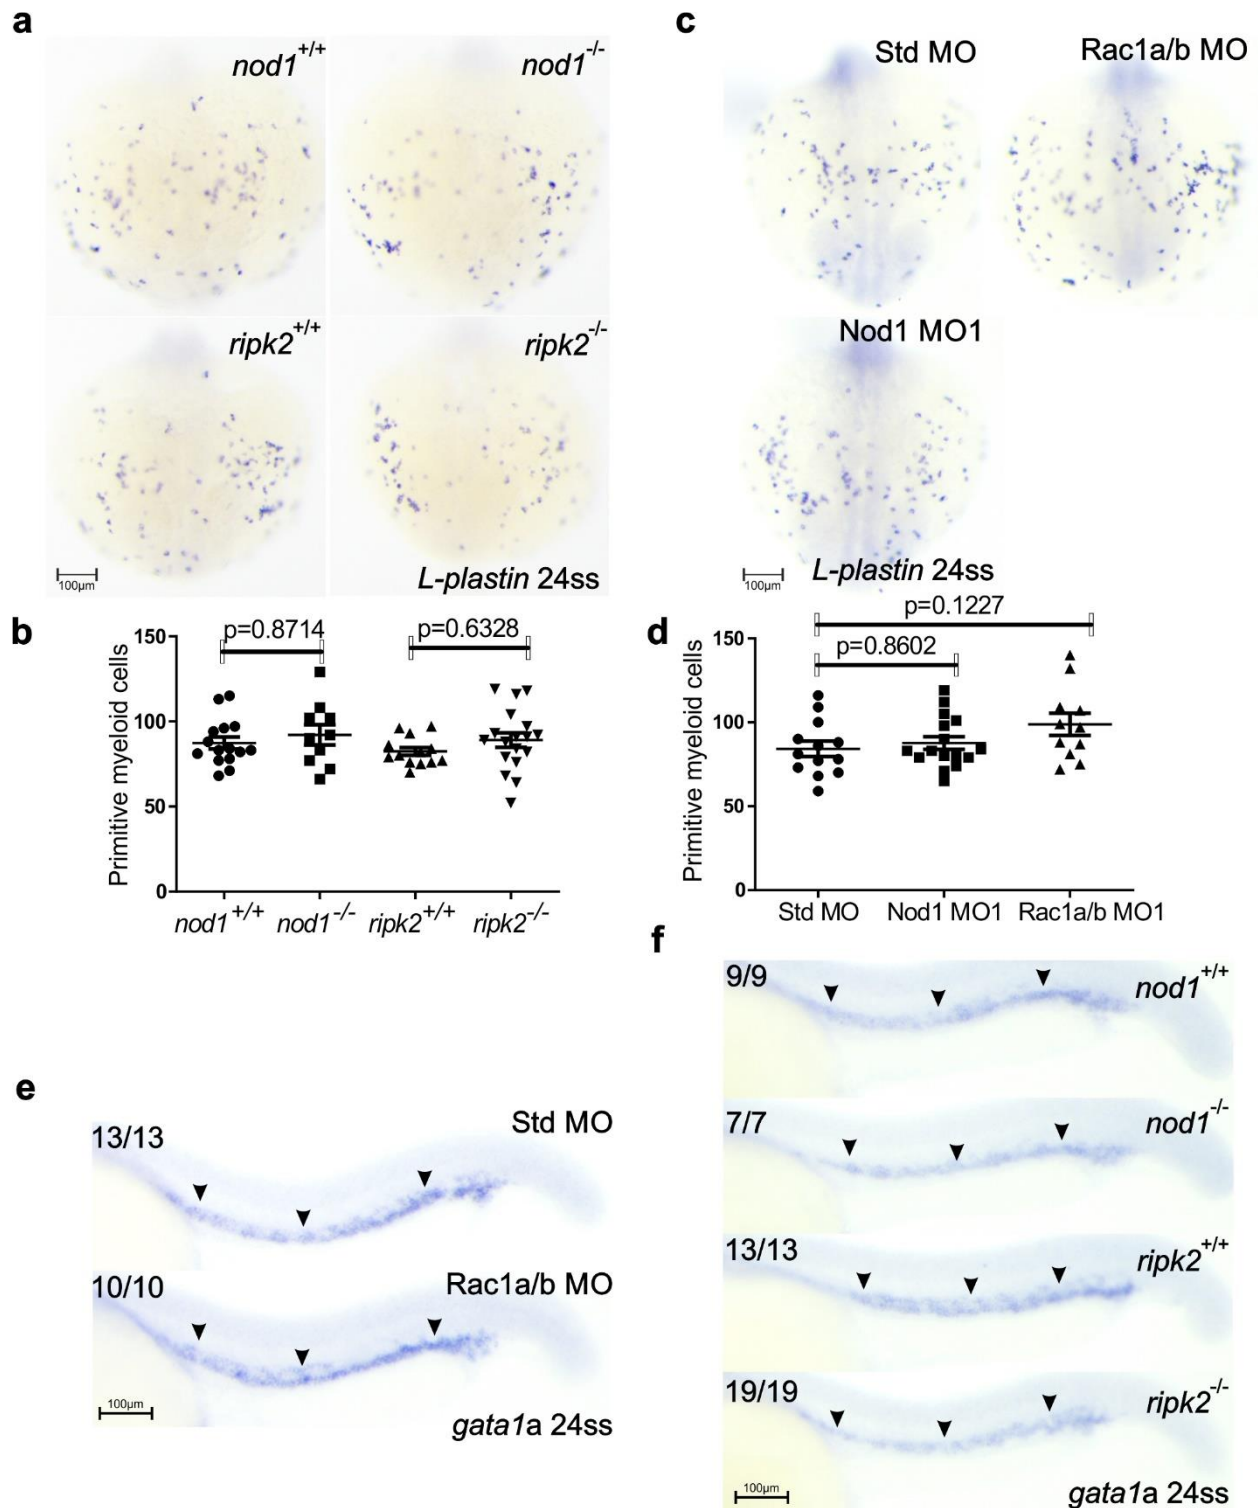

**Supplementary Figure 7.**

**(a)** *nod1*<sup>+/+</sup>, *nod1*<sup>-/-</sup>, *ripk2*<sup>+/+</sup> and *ripk2*<sup>-/-</sup> embryos were examined by WISH for *L-plastin* expression in the yolk ball at 24 somites (ss). **(b)** Quantification of *L-plastin*<sup>+</sup> myeloid cells from (a). Each dot represents total myeloid cells per embryo. n=14, 10, 13, 19 biological replicates from left to right. **(c)** Zebrafish embryos injected with Std MO, Rac1a/b MO and Nod1 MO1 were subjected to WISH for the myeloid cells marker *L-plastin* at 24ss. **(d)** Quantification of *L-plastin*<sup>+</sup> myeloid cells from (c). Each dot represents total myeloid cells

per embryo. n=13, 14, 11 biological replicates from left to right. **(e)** Zebrafish embryos injected with Std MO and Rac1a/b MO were subjected to WISH for erythrocytes marker *gata1a* at 24ss. Arrowheads denote *gata1a*<sup>+</sup> erythrocytes along the dorsal aorta. n=13 Std MO, n=10 Rac1a/b MO. **(f)** *nod1*<sup>+/+</sup>, *nod1*<sup>-/-</sup>, *ripk2*<sup>+/+</sup> and *ripk2*<sup>-/-</sup> embryos examined by WISH for *gata1a* expression at 24ss. Arrowheads denote *gata1a*<sup>+</sup> erythrocytes along the dorsal aorta. n=9 *nod1*<sup>+/+</sup>, n=7 *nod1*<sup>-/-</sup>, n=13 *ripk2*<sup>+/+</sup>, n=19 *ripk2*<sup>-/-</sup>. All views are lateral, with anterior to the left. All quantifications are represented with mean ± SEM. Data was analyzed by ordinary one-way ANOVA with Tukey's multiple comparisons test (b, d). Source data are provided as a Source Data file.

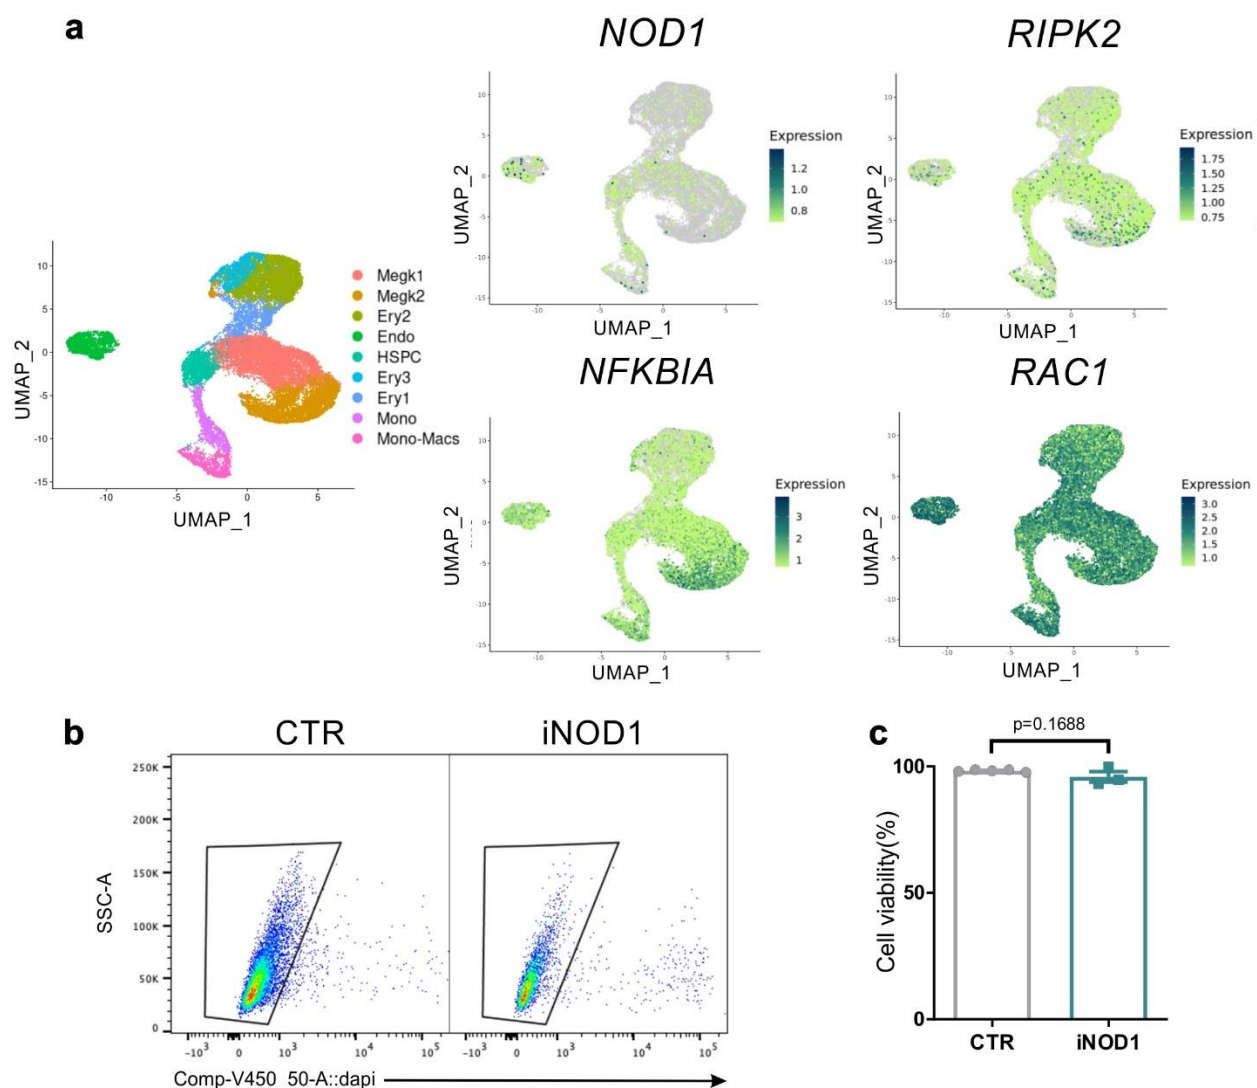

**Supplementary Figure 8.**

**(a)** UMAP visualization of the expression of indicated genes from scRNAseq dataset from definitive uncommitted hematopoietic progenitors and primed differentiated hematopoietic lineages. Each dot represents one cell. Grey denotes minimal expression, green intermediate, and blue high. MegK, Megakaryocyte progenitor; Ery, Erythroid progenitor; HSPC, Hematopoietic Stem and Progenitor cells; Mono, Monocytes progenitor; Mono-Macs, Monocytes - Macrophages progenitor. **(b-c)** Cell viability assessed by DAPI and flow cytometry in iNOD1 from day 2 of definitive hematopoietic differentiation.  $n=5$ , CTR;  $n=3$ , iNOD1. All quantifications are represented with mean  $\pm$  SEM. Data was analyzed by unpaired two-tailed T-test (c). Source data are provided as a Source Data file.

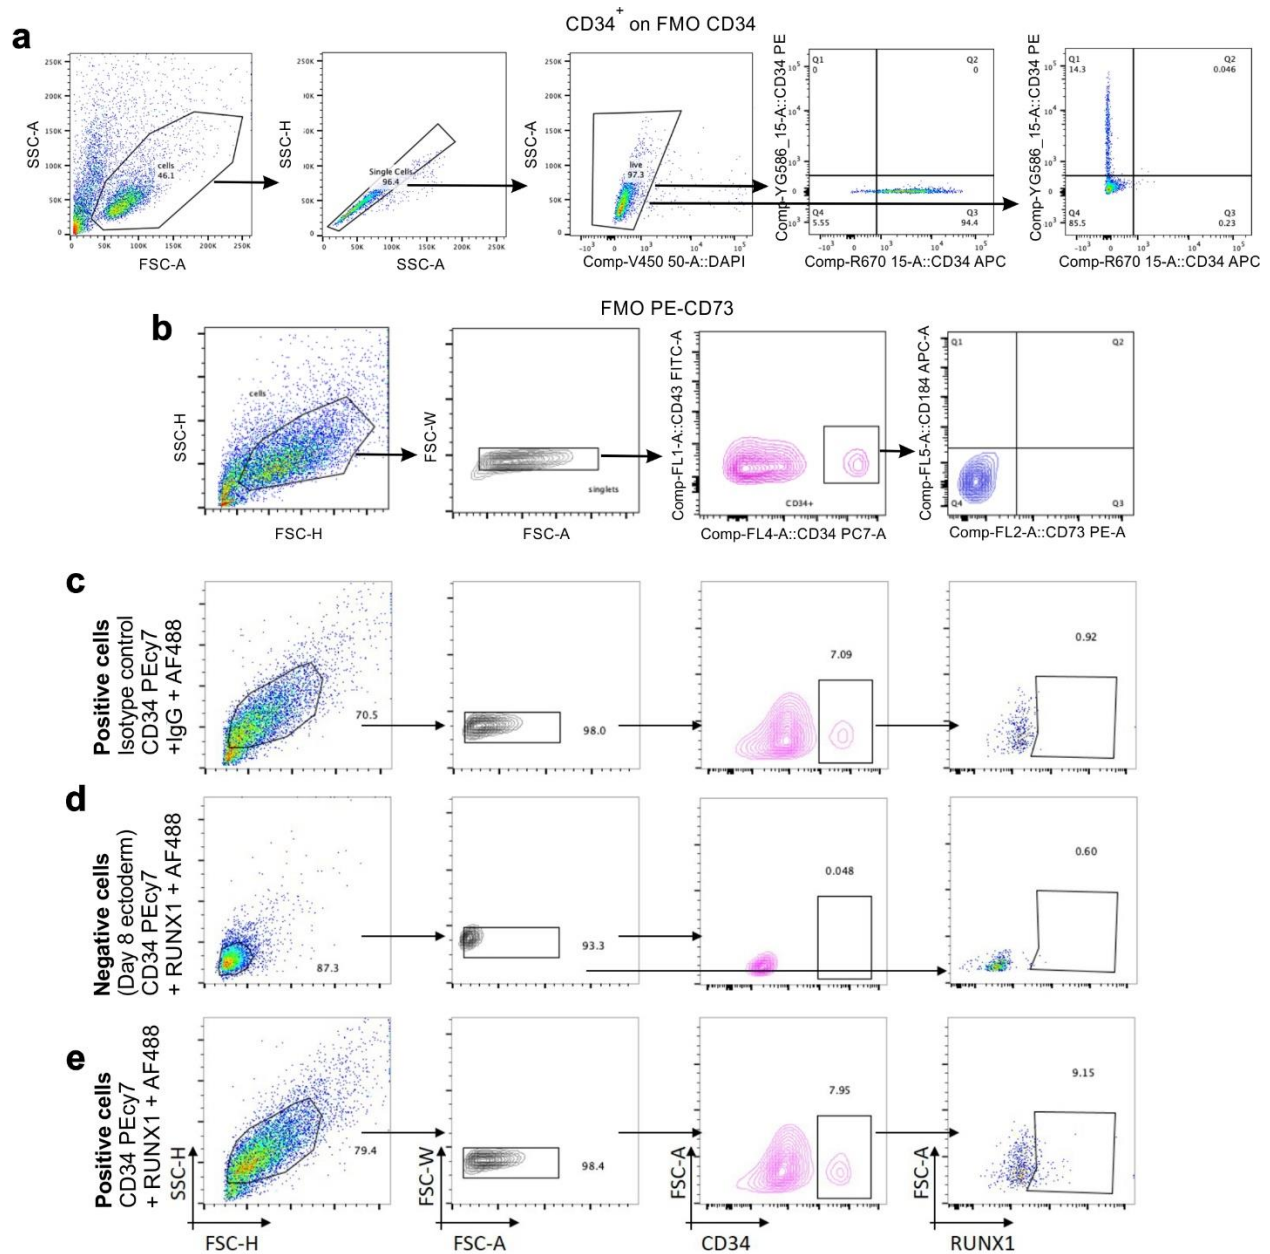

**Supplementary Figure 9.**

Representative gating strategies and RUNX1 antibody validation from flow cytometric dot plots in Fig. S8b (a), Fig. 8e (b), and Fig. 8f (c-e). **(a-e)** Live cells were gated on forward scatter (FSC-A or FSC-H) and side scatter (SSC-A or SSC-H), and singlets on side scatter (SSC-H, SSC-A) or forward scatter (FSC-A/FSC-W). The DAPI, CD73, 184 levels were measured within the CD34<sup>+</sup> EC-like fraction. **(c-e)** RUNX1 antibody validation and gating strategy. Fixed and permeabilized cells were gated on forward scatter (FSC-H) and side scatter (SSC-H), and singlets on forward scatter (FSC-A/FSC-W). RUNX1 levels were measured within the CD34<sup>+</sup> EC-like fraction. To establish staining specificity, two negative controls were used: positive cells (containing CD34<sup>+</sup> cells at day 9) stained with an isotype control and secondary antibody (c), and negative cells (d) from iPSC-derived ectoderm at day 8 (which do not contain mesoderm-derived cells neither RUNX1 expression) stained with CD34 and RUNX1 antibodies. (e) Positive cells (containing CD34<sup>+</sup> cells at day 9) were analyzed with CD34 and RUNX1 antibodies, resulting in ~9% of RUNX1<sup>+</sup> stained cells.

**Table S1. Primer Sequences Used in This Study. Related to Experimental Procedures.**

| Gene                           | Accession      | Directionality | Nucleotide sequence (5'→3')                            | Use                                                    |
|--------------------------------|----------------|----------------|--------------------------------------------------------|--------------------------------------------------------|
| <i>nod1</i>                    | XM_002665060.6 | F              | GGCACGAACAATTTTCGTTTT                                  | gRNA validation                                        |
|                                |                | R              | CTGTTTTAGTGCTGCTGCGC                                   |                                                        |
|                                |                | F              | GCGGTATTGAGGTTCTGGCT                                   | qPCR                                                   |
|                                |                | R              | TGTGGTTTTGGTAAAGGCCCA                                  |                                                        |
|                                |                | F              | GTGAAGGTGTTGGGGTGAGT                                   | sa17969 mutant line validation                         |
|                                |                | R              | CAAACAAGTGACCACCATGC                                   |                                                        |
|                                |                | F              | GATCTTTCATTTTCATTTTTCAGAGCCCGA                         | Morpholino validation                                  |
|                                |                | R              | GATCTCGGGCTCTGAAAAATGAAATGAAA                          |                                                        |
| <i>ripk2</i>                   | NM_194411.2    | F              | GGGTCTGCCGTCATCATTAAAT                                 | <i>ripk2</i> <sup>z40/z40</sup> mutant line validation |
|                                |                | R              | GTGAGGGGTTGTATGGCAAGA                                  |                                                        |
|                                |                | F              | GGGTCTAGTACGTAGGCTGGA                                  | qPCR                                                   |
|                                |                | R              | CACCGGTAATGTGCTGGTGA                                   |                                                        |
| <i>rac1a</i>                   | NM_199771.1    | F              | CCGCTCTTGTTTTGCGTGTT                                   | qPCR                                                   |
|                                |                | R              | TTTTTCCACAGCCCCGTCC                                    |                                                        |
|                                |                | F              | ACTCATGGATATCGGCAAGC                                   | gRNA validation                                        |
|                                |                | R              | CGGTCGAAGCCTGTCATAAT                                   |                                                        |
| <i>rac1b</i>                   | NM_001039818.1 | F              | GGGGTTTTTCATCAGTTCCGC                                  | qPCR                                                   |
|                                |                | R              | TTTTACCCACAGCCCCGTCA                                   |                                                        |
|                                |                | F              | AGGAAGCTGCCATGGTGTTA                                   | gRNA validation                                        |
|                                |                | R              | CATGTCTGCAGGTTTGTGCT                                   |                                                        |
| <i>nod2</i>                    | NM_001328044.1 | F              | ACACA CC CACAACAGGTTT                                  | qPCR                                                   |
|                                |                | R              | GAAGAGGGACTGCGATGCAA                                   |                                                        |
| <i>cdc42</i>                   | NM_001018120.2 | F              | CTCTGACGCAGCGAGGTC                                     | qPCR                                                   |
|                                |                | R              | TGCGTTTCAGGAGTTTCGAG                                   |                                                        |
| <i>rho</i>                     | NM_131084.1    | F              | CCGGAGCCCATACGAATACC                                   | qPCR                                                   |
|                                |                | R              | AGGAAGAACATGTAGGCCGC                                   |                                                        |
| <i>ef1a</i>                    | NM_131263.1    | F              | GAGAAGTTCGAGAAGGAAGC                                   | qPCR                                                   |
|                                |                | R              | CGTAGTATTTGCTGGTCTCG                                   |                                                        |
| <i>ciita</i>                   | XM_005163915.4 | F              | GCACTGTGGTTCAGACAGGA                                   | qPCR                                                   |
|                                |                | R              | CAACCGTACCATCAGCAGGT                                   |                                                        |
| <i>nlr5</i>                    | NM_001386270.1 | F              | TCCTTCTGTCTGTGTCTC                                     | qPCR                                                   |
|                                |                | R              | TCAGCTTGGTGCCTGAGTTC                                   |                                                        |
| <i>nlr1</i>                    | XM_680389.9    | F              | TCCACACAGTGCATCTGTACC                                  | qPCR                                                   |
|                                |                | R              | CAGAGATGTCCGAACCCTCG                                   |                                                        |
| <i>P2A</i>                     | N/A            | F              | GAATTCACCCGGGTACCGCTACTA<br>ACTTCAGCCTGCTGAAG          | <i>P2A</i> cloning                                     |
|                                |                | R              | GCCATTTCTACCGGTACAGGTCCA<br>GGGTTCTCCTCC               |                                                        |
| <i>ikkb<sub>CA</sub></i>       | N/A            | F              | CGGCAAGGGTTCGACTCTAGAATGA<br>GCCGTCCGCC                | <i>ikkb<sub>CA</sub></i> cloning                       |
|                                |                | R              | GCTGAAGTTAGTAGCGGTACCAGC<br>CAGATCCTGTCCTCC            |                                                        |
| <i>ikkb<sub>CA</sub>- mRFP</i> | N/A            | F              | GAACCGCCTGCAGAGTTTAG                                   | <i>Fli1b:Gal4;UAS:ikkb<sub>CA</sub></i> genotyping     |
|                                |                | R              | GTCTCGAAGTTCATCACGC                                    |                                                        |
| <i>Rac1-Q61R</i>               | N/A            | F              | CGGATATCGATAAGCTTGATATCGA<br>ATTCATGCAGGCCATCAAGTGTG   | <i>rac1-Q61R</i> cloning                               |
|                                |                | R              | CCGTATCGATACTAGTCCTGCAGGT<br>TACAACAGCAGGCATTTTCTCTTCC |                                                        |

|                       |     |   |                                                    |                              |
|-----------------------|-----|---|----------------------------------------------------|------------------------------|
| <i>Cre-cmlc2-eGFP</i> | N/A | F | TTGCGCTGATGCCAGTTGCGGCC<br>GCGAGGATCATAATCAGCCATAC | <i>cmlc2-eGFP</i><br>cloning |
|                       |     | R | CGAATTCCTGCAGCCCGGGGCCTG<br>CAGGACTAGTATCGATACGGAC |                              |
| <i>ikkb</i>           | N/A | F | ATATGAATTCatgagccgtccgccctccatgc<br>agcca          | Ikbb cloning                 |
|                       |     | R | CCTATCTCGAGtcaagccagatcctgtcctc<br>cggtca          |                              |

**Table S2. Morpholinos (MOs) Used in This Study. Related to Experimental Procedures.**

| Name     | Sequence (5'-3')           | Concentration | Reference               |
|----------|----------------------------|---------------|-------------------------|
| Std MO   | CCTCTTACCTCAGTTACAATTTATA  | 0.4mM         | Gene Tools              |
| Nod1 MO1 | TTTCATTTTCATTTTTCAGAGCCCGA | 0.8mM         | This study              |
| Nod1 MO2 | ACCAAATAAACATTACCTGGTCTGT  | 1mM           | (Oehlers et al., 2011)  |
| Ripk2 MO | GCTCCATGTTTCTGGACATTAGGAG  | 1mM           | This study              |
| Rac1a MO | CCACACACTTTATGGCCTGCATCTG  | 0.28mM        | (Mikdache et al., 2020) |
| Rac1b MO | CCACACACTTGATGGCCTGCATGAC  | 0.28mM        | (Epting et al., 2015)   |

**Table S3. Chemicals Used in This Study. Related to Experimental Procedures.**

| Name                     | Use             | Concentration used  | Reference                  |
|--------------------------|-----------------|---------------------|----------------------------|
| C12-iE-DAP               | Nod1 agonist    | 250ng/μl – 400ng/μl | InvivoGen (tlrl-c12dap)    |
| Rho Kinase Inhibitor III | Rho inhibitor   | 15 μM               | (Weiser et al., 2009)      |
| Hydrochloride            | Rac1 inhibitor  | 50 μM               | (Nussbaum et al., 2013)    |
| ML141                    | Cdc42 inhibitor | 40 μM               | (Stanganello et al., 2015) |
| DAPI                     | Nuclei staining | 1:1000              | N/A                        |
| Nodinitib-1 (iNOD1)      | Nod1 inhibitor  | 15μM-30μM           | (Correa et al., 2011)      |

**Table S4. Antigens and Secondary Antibody Used in This Study. Related to Experimental Procedures.**

| Antigen             | Clone name | Fluorophore | Manufacturer  | Catalog number | Lot number | Dilution |
|---------------------|------------|-------------|---------------|----------------|------------|----------|
| CD34                | 4H11       | PE          | Thermo Fisher | 12034942       | N/A        | 1:200    |
| CD43                | eBio84-3C1 | APC         | ebioscience   | 17043942       | N/A        | 1:100    |
| CD43                | MEM-59     | FITC        | Biolegend     | <b>315204</b>  | B293675    | 1:100    |
| CD34                | 4H11       | FE-Cy7      | Invitrogen    | 25-0349-42     | 2011157    | 1:100    |
| CD73                | AD2        | PE          | BD            | 550257         | 5020998    | 1:25     |
| CD184               | 12G5       | APC         | BD            | 555976         | 6154735    | 1:100    |
| RUNX1               | D33G6      | N/A         | CST           | 4336           | 5          | 1:500    |
| Rabbit IgG          | DA1E       | N/A         | CST           | 3900           | 49         | 1:2500   |
| Secondary Ab        | Clone name | Fluorophore | Manufacturer  | Catalog number | Lot number | Dilution |
| Anti-Digoxigenin-AP | N/A        | N/A         | Roche         | 11093274910    | 57696520   | 1:5000   |
| Streptavidin        | N/A        | Alexa 647   | Thermo Fisher | S21374         | 2145944    | 1:500    |
| Goat anti Rabbit    | N/A        | AF647       | Invitrogen    | A21245         | 1863958    | 1:1000   |
